# Supplementary material for: Calcium-Dependent Protein Kinase Genes in Glycyrrhiza Uralensis Appear to be Involved in Promoting the Biosynthesis of Glycyrrhizic Acid and Flavonoids under Salt Stress
Source: MDPI journal article supplement (doi:10.3390/molecules24091837), 2019-05-13
Supplement: s1 [file s1]

**Supplementary Table S4. Putative *cis*-acting element sequences in promoter regions of *GuCPK* genes.**

| Classification              | Symbol | <i>cis</i> -element | Sequence*    | Description                                                              |
|-----------------------------|--------|---------------------|--------------|--------------------------------------------------------------------------|
| Transcription initiation    | T      | TATA box            | TAATA        | core promoter element around -30 of transcription start                  |
|                             | C      | CAAT box            | CAATT        | common <i>cis</i> -acting element in promoter and enhancer regions       |
| Phytohormone responsiveness | A      | ABRE                | ACGTGGC      | <i>cis</i> -acting element involved in the abscisic acid responsiveness  |
|                             | E      | ERE                 | ATTTCAAA     | Ethylene-responsive element                                              |
|                             | N      | TGA                 | AACGAC       | auxin-responsive element                                                 |
|                             | G      | GARE                | WAACAR       | Gibberellin-responsive element                                           |
|                             | P      | P-box               | CCTTTTG      | Gibberellin-responsive element                                           |
| Stress responsiveness       | M      | MBS                 | TAACTG       | MYB binding site involved in drought-inducibility                        |
|                             | S      | MBSI                | aaaAaaCSGTTA | MYB binding site involved in flavonoid biosynthetic genes regulation     |
|                             | R      | MRE                 | AACCTAA      | MYB binding site involved in light responsiveness                        |
|                             | H      | HSE                 | AAAAAATTTC   | <i>cis</i> -acting element involved in heat stress responsiveness        |
|                             | D      | TC-rich             | ATTTTCTCCA   | <i>cis</i> -acting element involved in defense and stress responsiveness |
|                             | J      | G-box               | CACGTT       | <i>cis</i> -acting regulatory element involved in light responsiveness   |

|                    |   |                       |             |                                                                             |
|--------------------|---|-----------------------|-------------|-----------------------------------------------------------------------------|
|                    | B | Box I                 | TTTCAAA     | light responsive element                                                    |
|                    | O | ARE                   | TGGTTT      | <i>cis</i> -acting regulatory element essential for the anaerobic induction |
|                    | F | AE-box                | AGAAACAA    | part of a module for light response                                         |
|                    | I | I-box                 | GATAAGATT   | part of a light responsive element                                          |
|                    | P | 3-AF1                 | AAGAGATATTT | light responsive element                                                    |
|                    | L | LTR                   | CCGAAA      | <i>cis</i> -acting element involved in low-temperature responsiveness       |
| High transcription | U | 5'UTR Py-rich stretch | TTTCTTCTCT  | <i>cis</i> -acting element conferring high transcription levels             |

\*: N = A, C, G or T; S = C or G.
