# Supplementary material for: Calcium-Dependent Protein Kinase Genes in Glycyrrhiza Uralensis Appear to be Involved in Promoting the Biosynthesis of Glycyrrhizic Acid and Flavonoids under Salt Stress
Source: MDPI journal article supplement (doi:10.3390/molecules24091837), 2019-05-13
Supplement: s1 [file s1]

**Supplementary Table S1. Primers used in this work.**

| <b>Primer name</b>  | <b>Primer sequence (5'-3')</b> | <b>Product size (bp)</b> |
|---------------------|--------------------------------|--------------------------|
| GuCPK1-sense        | GAGAAAGATGGGAAATGACG           | 280                      |
| GuCPK1-antisense    | TTCAGGCTGAGACTGGTAAA           |                          |
| GuCPK2-sense        | GCAACCTACGAGGACAACGA           | 195                      |
| GuCPK2-antisense    | ATAGTAAGGACTCCCAACAATCT        |                          |
| GuCPK2F-sense*      | ATGGGAAACTGCAACGT              | 1653                     |
| GuCPK2F-antisense*  | TCAAACCACTACCGCTT              |                          |
| GuCPK3-sense        | GGTGGGCAGTGCTTACTATGT          | 152                      |
| GuCPK3-antisense    | TGGCGTTAAATATTCCCTTTTCAGT      |                          |
| GuCPK4-sense        | CGCATTACTTCTGCTCAGGT           | 187                      |
| GuCPK4-antisense    | TTGCCTTCAAACCTTGGATC           |                          |
| GuCPK5-sense        | CACTCATTCTGATCCCTCCG           | 155                      |
| GuCPK5-antisense    | CATAATACGCTTG GTTGTCTG         |                          |
| GuCPK6-sense        | ATGACGATGCCGTTACCTC            | 289                      |
| GuCPK6-antisense    | ATGACTCCAGCACTCCAGAT           |                          |
| GuCPK6F-sense*      | ATGGGAAATTGCTGTACG             | 1568                     |
| GuCPK6F-antisense*  | TCATCTACCTTCATTTTCTAA          |                          |
| GuCPK7-sense        | ACGCAGCCAATCGCAAAC             | 283                      |
| GuCPK7-antisense    | TGTCCGTGACCCAACAAC             |                          |
| GuCPK8-sense        | CCTCAGCAACGACGAGAATT           | 107                      |
| GuCPK8-antisense    | CATAATAGGCACTCCCAACAA          |                          |
| GuCPK9-sense        | GCAGGGCTTCAAGCAGAGTC           | 169                      |
| GuCPK9-antisense    | CCAGTTTCACCTTTGGGATG           |                          |
| GuCPK9F-sense*      | CTTAAGGCAATAGATTTTGGAATGTCT    | 370                      |
| GuCPK9F-antisense*  | GCAACACCGTCAACCTGAATCCAAG      |                          |
| GuCPK10-sense       | CCATCGCCGAGGTTGTTAGG           | 270                      |
| GuCPK10-antisense   | CAGTCTCAGCCCAAAAAGGA           |                          |
| GuCPK10F-sense*     | ATGGGGAATTGCTGCACGT            | 1650                     |
| GuCPK10F-antisense* | TCAAACCACAACAGCTTGGCCACTG      |                          |
| GuCPK11-sense       | ATAGGCGGGTTGAAAGAGTT           | 144                      |
| GuCPK11-antisense   | ATCAGCCGCATCCATAAGAG           |                          |
| GuCPK12-sense       | AACTAATGAGCCTGAATCCC           | 288                      |
| GuCPK12-antisense   | TACTGGTGTCCCGTTGCTTT           |                          |
| GuCPK13-sense       | GTTGTCAGCCTTCTCCTATT           | 257                      |
| GuCPK13-antisense   | CATTGCCTACTATTCCCAGA           |                          |
| GuCPK13F-sense*     | ATGGCGAAATCGAATTCGAGC          | 1615                     |
| GuCPK13F-antisense* | TCAATTTTCATGCAATGAATCATCT      |                          |
| GuCPK14-sense       | CCACAAGAACACTGGGAAAC           | 194                      |
| GuCPK14-antisense   | CTGCACACAATTCCATCACC           |                          |
| GuCPK15-sense       | TTTTATCACGCCTGAAGCAA           | 265                      |
| GuCPK15-antisense   | TCACCATAGTCAAGTGTCCC           |                          |
| GuCPK16-sense       | ATGGGTGGCTGTCTGAGTAA           | 115                      |

|                     |                         |      |
|---------------------|-------------------------|------|
| GuCPK16-antisense   | TTGATTGGTTCACAAAGGGT    |      |
| GuCPK16F-sense*     | AAATCTCTCTTTTTTTGTGCCA  | 1705 |
| GuCPK16F-antisense* | AAACTTTTAGTGAGCCCTTCCC  |      |
| GuCPK17-sense       | GCTGTTGCTGTCCATGTTGT    | 221  |
| GuCPK17-antisense   | GCCTAGCTGCCTTTCTCTCA    |      |
| GuCPK17F-sense*     | GATGCTTATAGTGTTAGATGGG  | 1756 |
| GuCPK17F-antisense* | CTTAACATACAGGTAGTGCCTC  |      |
| GuCPK18-sense       | CTATGTGGCTCCAGAGGTGT    | 247  |
| GuCPK18-antisense   | GGTAATGCGTTTCTTAGGGT    |      |
| GuCPK19-sense       | GGCAAATGTTAGAACCAGACC   | 109  |
| GuCPK19-antisense   | ACATCTCCAAGAGGAACATTAGG |      |
| GuCPK20-sense       | TTTTGGGATGAAACGGAACA    | 196  |
| GuCPK20-antisense   | GAGCAACACCTCCAACCTGA    |      |
| GuCPK21-sense       | TGGGCAGAATCCGAACATGGTA  | 158  |
| GuCPK21-antisense   | AAAAC TTCCCCCGCCGTCAG   |      |
| GuCPK22-sense       | GTTCTTAGAGTGGTTGCCGATA  | 168  |
| GuCPK22-antisense   | CTGGACATCAGGATCAGGAATA  |      |
| GuCPK22F-sense*     | ACCTTGTCATGGAGCTCTGC    | 792  |
| GuCPK22F-antisense* | ATCAGGAATAGCGTGTCCAATC  |      |
| GuCPK23-sense       | TCTCCCTAAACTGGGTACTAAA  | 186  |
| GuCPK23-antisense   | CCGCTCTTATCCTGGTCAAA    |      |
| GuActin-sense       | CCTCAACCCAAAGGTCAACAG   |      |
| GuActin-antisense   | GACCAGCGAGATCCAAACGAA   |      |

---

\*: Primers used for amplifying the full-length open reading frame sequences of *GuCPKs*.
