# Supplementary material for: Calcium-Dependent Protein Kinase Genes in Glycyrrhiza Uralensis Appear to be Involved in Promoting the Biosynthesis of Glycyrrhizic Acid and Flavonoids under Salt Stress
Source: MDPI journal article supplement (doi:10.3390/molecules24091837), 2019-05-13
Supplement: s1 [file s1]

Supplementary Table S3. Detailed information of *GuCPKs*.

| Gene name      | Scaffold location <sup>a</sup>    | Predicted Protein <sup>b</sup> |             |          |      | N-termianal AA. | Palmitoylation     | Myristoylation     | Subcellular location <sup>c</sup> |
|----------------|-----------------------------------|--------------------------------|-------------|----------|------|-----------------|--------------------|--------------------|-----------------------------------|
|                |                                   | ORF (bp)                       | Length (aa) | MW (kDa) | pI   |                 | sites <sup>c</sup> | sites <sup>d</sup> |                                   |
| <i>GuCPK1</i>  | scaffold0019 (-): 599558 - 604247 | 1644                           | 547         | 61.63    | 6.11 | MGNCCATP        | Yes                | n.d.               | P                                 |
| <i>GuCPK2</i>  | scaffold0020 (-): 183531 - 187574 | 1542                           | 513         | 57.69    | 5.86 | MGNCNVCA        | Yes                | n.d.               | P                                 |
| <i>GuCPK3</i>  | scaffold0026 (+): 234895 - 240067 | 1647                           | 548         | 61.06    | 5.95 | MGCHGSKE        | Yes                | Yes                | P                                 |
| <i>GuCPK4</i>  | scaffold0029 (-): 62755 - 67593   | 1638                           | 545         | 61.45    | 6.31 | MGSCSLG         | Yes                | Yes                | P                                 |
| <i>GuCPK5</i>  | scaffold0059 (+): 59588 - 69104   | 1683                           | 560         | 62.78    | 5.79 | MGNTCRGS        | Yes                | n.d.               | P                                 |
| <i>GuCPK6</i>  | scaffold0110 (+): 167069 - 171335 | 1503                           | 500         | 56.99    | 6.22 | MGNCCCTP        | Yes                | Yes                | P                                 |
| <i>GuCPK7</i>  | scaffold0140 (+): 307174 - 312863 | 1701                           | 566         | 64.30    | 9.22 | MGLCFSS         | Yes                | Yes                | P                                 |
| <i>GuCPK8</i>  | scaffold0143 (+): 95483 - 99940   | 1545                           | 514         | 58.11    | 6.60 | MGNRISRK        | n.d.               | Yes                | P                                 |
| <i>GuCPK9</i>  | scaffold0170 (-): 142051 - 146381 | 2025                           | 674         | 75.08    | 6.12 | MGNNCVGS        | Yes                | n.d.               | P                                 |
| <i>GuCPK10</i> | scaffold0204 (+): 73080 - 77284   | 1626                           | 541         | 61.34    | 5.85 | MGNCCCTCV       | Yes                | Yes                | P                                 |
| <i>GuCPK11</i> | scaffold0217 (+): 42799 - 46457   | 1620                           | 539         | 60.92    | 5.76 | LEREREGE        | n.d.               | n.d.               | P                                 |
| <i>GuCPK12</i> | scaffold0224 (-): 38473 - 43745   | 1731                           | 576         | 64.57    | 5.34 | MGNCTCVGP       | Yes                | n.d.               | P                                 |
| <i>GuCPK13</i> | scaffold0252 (+): 113646 - 118430 | 1650                           | 549         | 62.01    | 5.18 | MAKSNSST        | n.d.               | n.d.               | P                                 |
| <i>GuCPK14</i> | scaffold0254 (+): 139702 - 143097 | 1593                           | 530         | 59.18    | 5.66 | MGNCCSGG        | Yes                | Yes                | P                                 |
| <i>GuCPK15</i> | scaffold0282 (-): 102302 - 107315 | 1482                           | 493         | 55.77    | 5.33 | MSKSNTVV        | n.d.               | n.d.               | P                                 |
| <i>GuCPK16</i> | scaffold0364 (-): 96991 - 102305  | 1692                           | 563         | 63.57    | 8.51 | MGGCLSCK        | Yes                | Yes                | P                                 |
| <i>GuCPK17</i> | scaffold0475 (+): 46323 - 51388   | 1716                           | 571         | 63.15    | 5.73 | MGNNCVGS        | Yes                | n.d.               | P                                 |
| <i>GuCPK18</i> | scaffold0702 (-): 63458 - 70368   | 1581                           | 526         | 59.05    | 5.47 | MGLGVFKA        | n.d.               | n.d.               | P                                 |
| <i>GuCPK19</i> | Scaffold1037 (+): 77874 - 84236   | 1620                           | 539         | 60.29    | 6.08 | MGNCCRSP        | Yes                | n.d.               | P                                 |
| <i>GuCPK20</i> | Scaffold1288 (+): 66653 - 71753   | 1824                           | 607         | 66.40    | 5.51 | MGNNWVGP        | n.d.               | n.d.               | P                                 |
| <i>GuCPK21</i> | Scaffold1585 (+): 27089 - 31953   | 2097                           | 698         | 78.45    | 5.28 | MGNCCSQG        | Yes                | Yes                | P                                 |
| <i>GuCPK22</i> | Scaffold1732 (+): 21924 - 25798   | 1560                           | 519         | 58.83    | 5.63 | MGSCVSTQ        | Yes                | Yes                | P                                 |
| <i>GuCPK23</i> | Scaffold2052 (-): 7400 - 13113    | 1542                           | 513         | 57.64    | 6.01 | MGNCCSSG        | Yes                | Yes                | P                                 |

<sup>a</sup> scaffold location: [Scaffold number (Orientation): start - end], '+' and '-' indicate the forward and reverse orientation, respectively.

<sup>b</sup> aa, amino acid; MW, molecular weight; *pI*, isoelectric point.

<sup>c</sup> The predicted palmitoylation site of each GuCPK was using CSS-Palm 4.0.

<sup>d</sup> The predicted palmitoylation site of each GuCPK was using Myristoylator..

<sup>e</sup> The predicted subcellular location of each GuCPK was analyzed using Softberry server.
